# Supplementary material
Source: PubMed Central journal article supplement (PMC4568062)

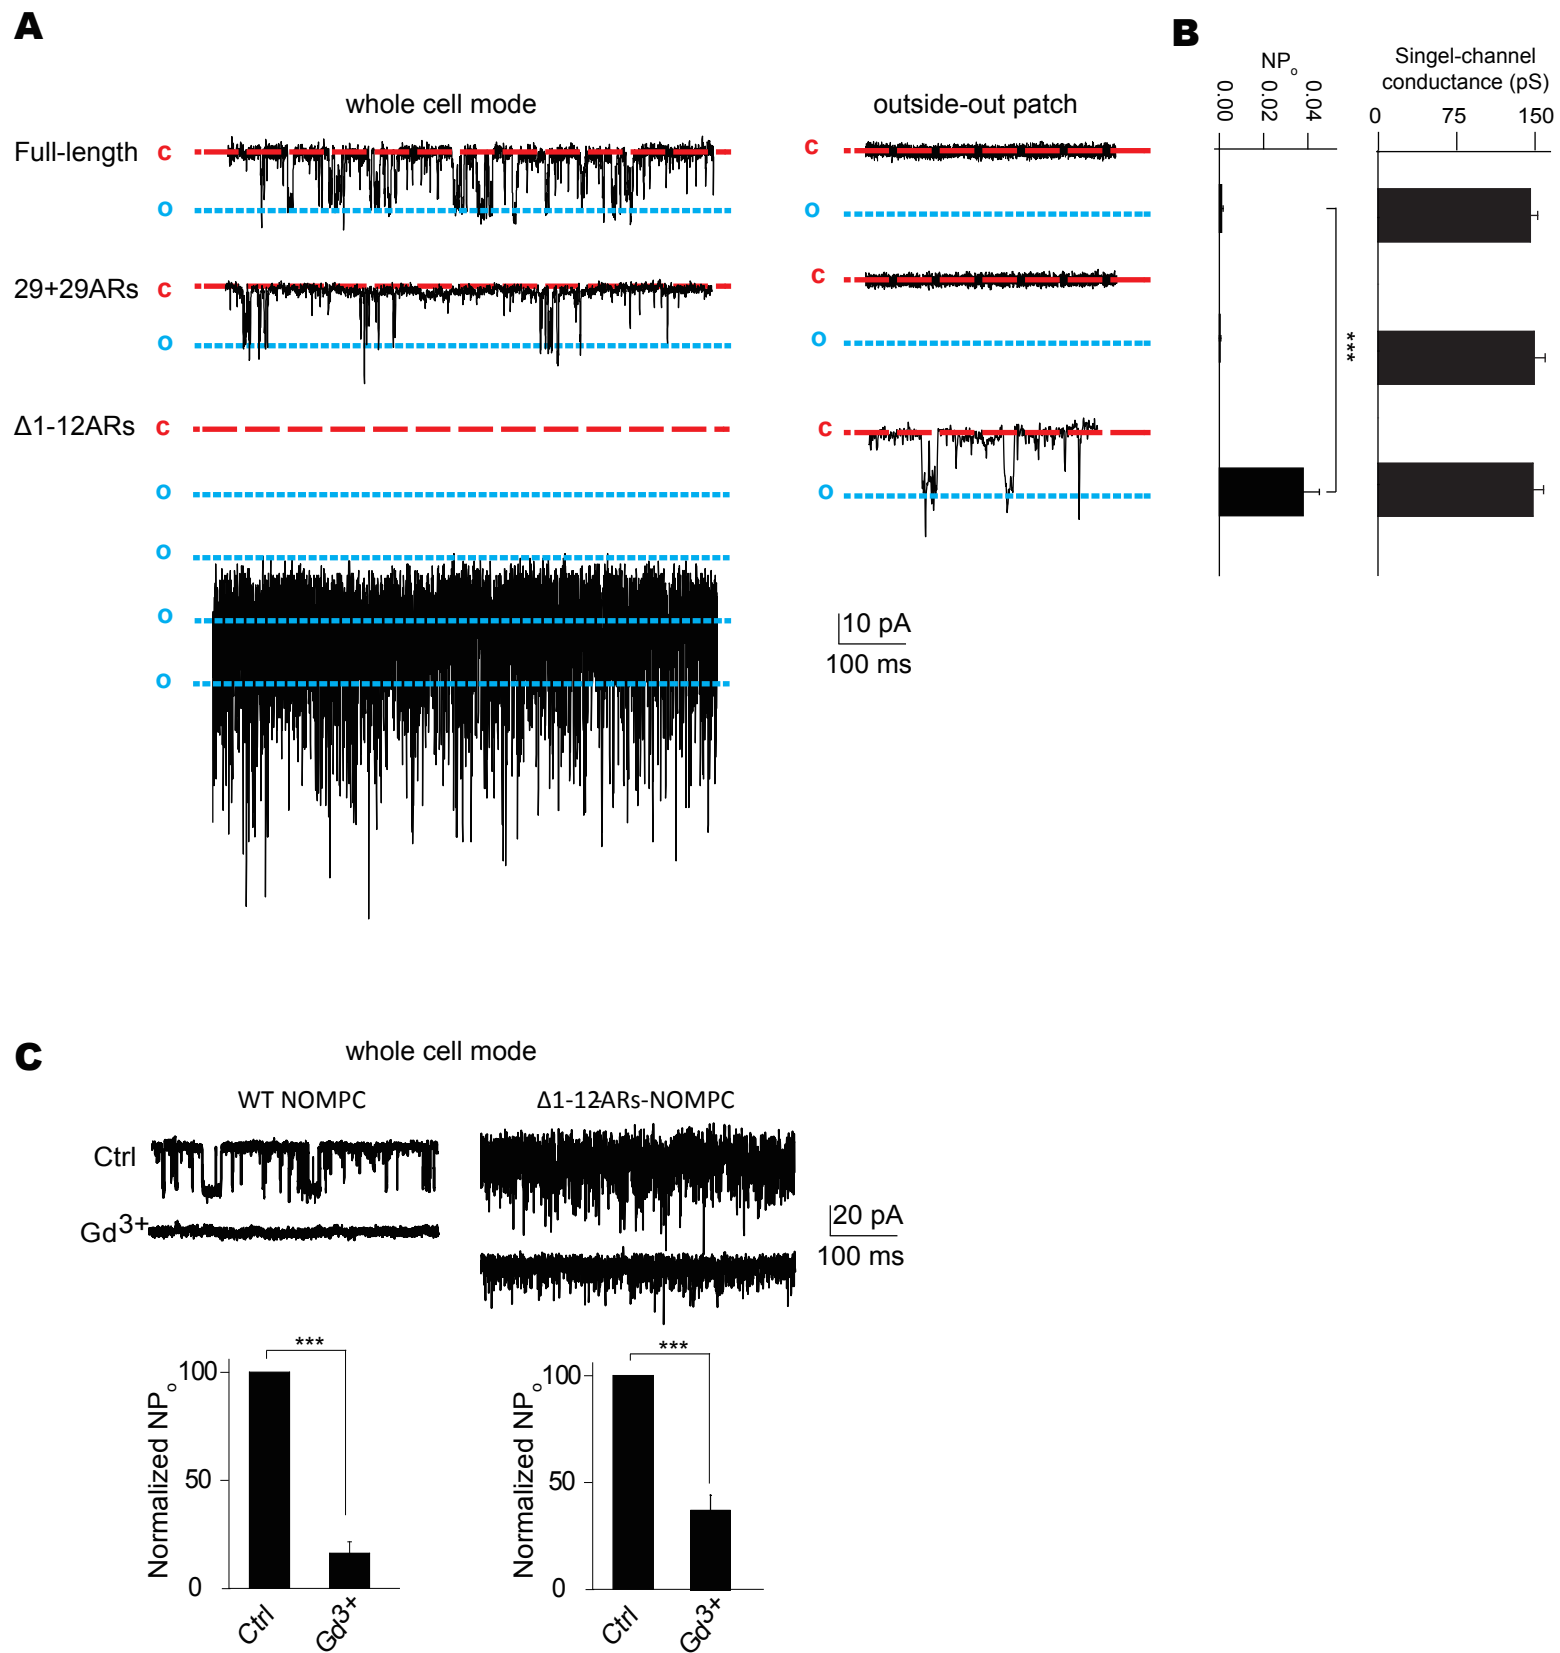

Supplement: NIHMS719752-supplement-2.pdf [file NIHMS719752-supplement-2.pdf]

Figure S3, Zhang, *et al.*

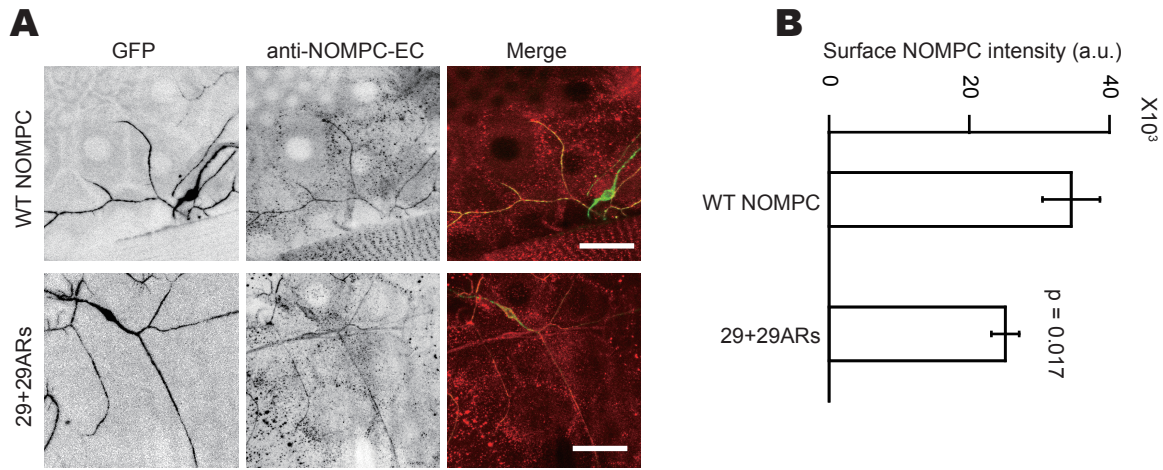

Supplement: NIHMS719752-supplement-3.pdf [file NIHMS719752-supplement-3.pdf]

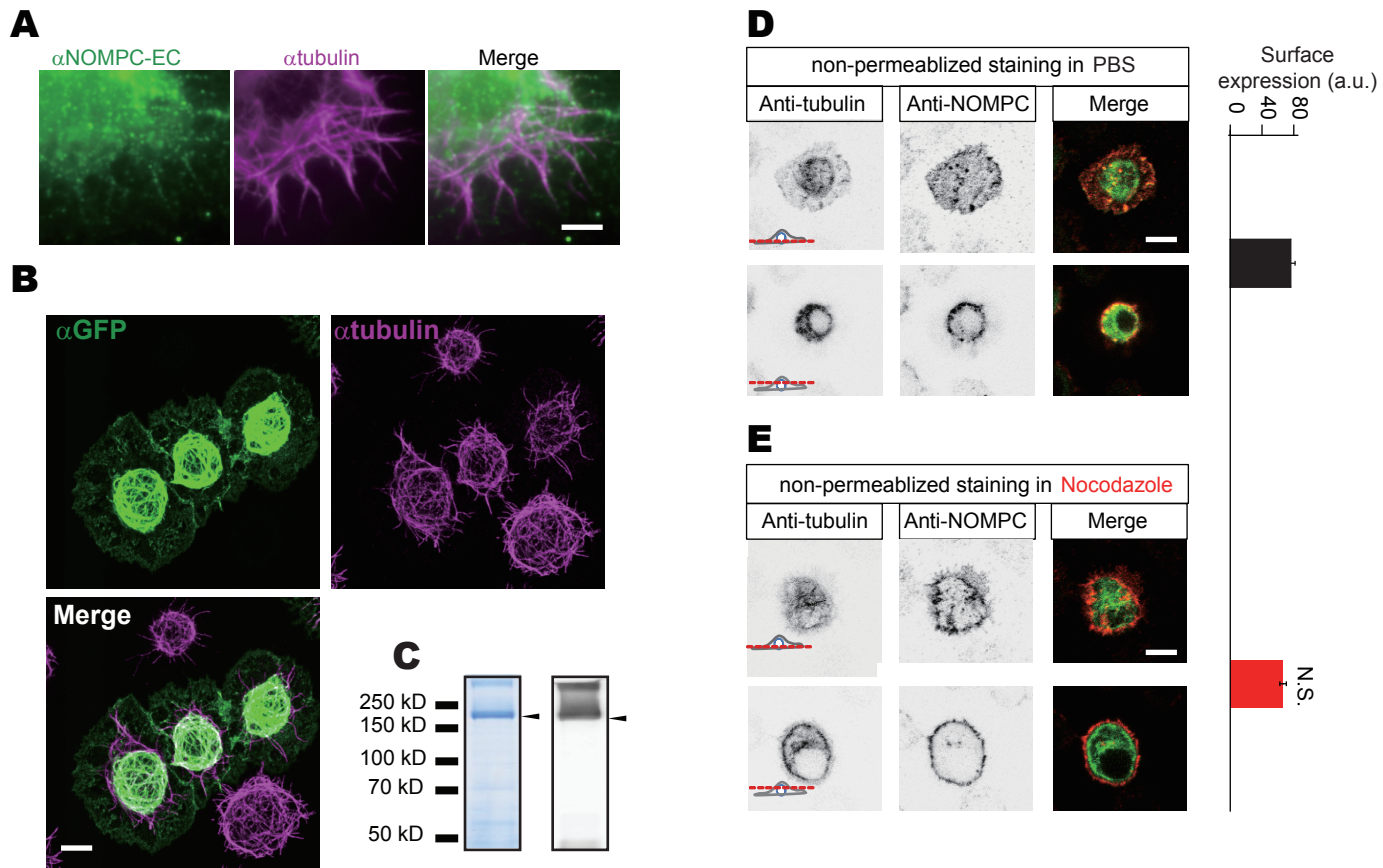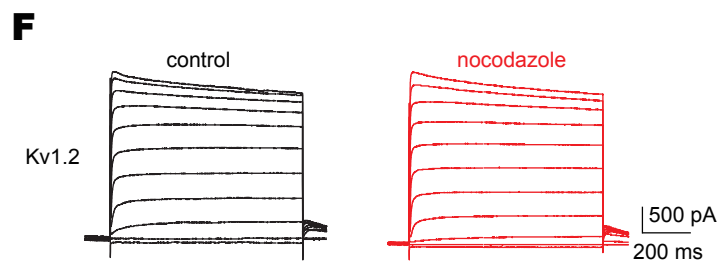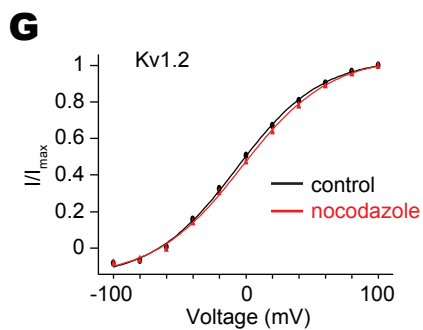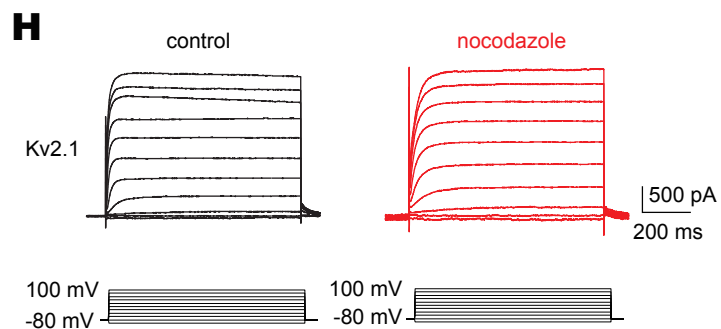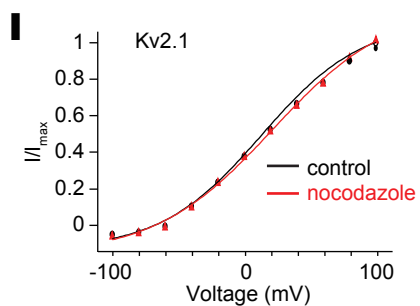

Supplement: NIHMS719752-supplement-5.pdf [file NIHMS719752-supplement-5.pdf]

Figure S7, Zhang, *et al.*

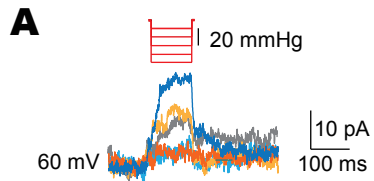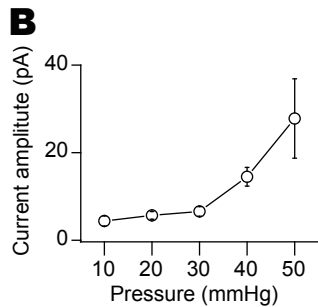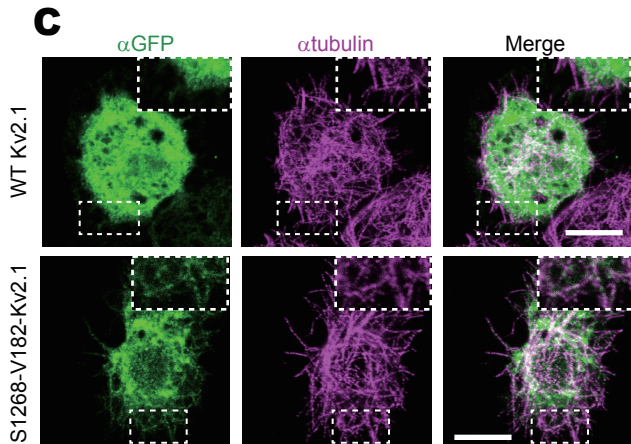

Supplement: NIHMS719752-supplement-7.pdf [file NIHMS719752-supplement-7.pdf]
